# Supplementary material for: A mixed-valent nonanuclear [Mn5IIMn4III] molecular cluster with cubic topology of highest symmetry as a bifunctional electrocatalyst for efficient water splitting
Source: Royal Society of Chemistry journal article supplement (doi:10.1039/d4ta02951h), 2024-01-01
Supplement: d4ta02951h1.pdf [file d4ta02951h1.pdf]

## Supplementary Information

### Mixed-valent nonanuclear [Mn<sup>II</sup><sub>5</sub>Mn<sup>III</sup><sub>4</sub>] molecular cluster with cubic topology of highest symmetry as bifunctional electrocatalyst for efficient water splitting

Chandan Sarkar,<sup>a</sup> Tapan Sarkar,<sup>a</sup> Aditi De,<sup>b</sup> Nityananda Dutta,<sup>a</sup> Julia Klak,<sup>c</sup> Allen G. Oliver,<sup>d</sup> Ranjay K. Tiwari,<sup>e</sup> J. N. Behera,<sup>e</sup> Subrata Kundu\*,<sup>b</sup> and Manindranath Bera\*<sup>a</sup>

<sup>a</sup>Department of Chemistry, University of Kalyani, Nadia, West Bengal-741235, INDIA.

<sup>b</sup>Process Engineering (EPE) Division, Central Electrochemical Research Institute, Karaikudi-630006, Tamil Nadu, INDIA, and Academy of Scientific and Innovative Research (AcSIR), Ghaziabad-201002, INDIA.

<sup>c</sup>Faculty of Chemistry, University of Wroclaw, Wroclaw 50383, POLAND.

<sup>d</sup>Department of Chemistry and Biochemistry, University of Notre Dame, Notre Dame, IN 46556-5670, USA.

<sup>e</sup>School of Chemical Sciences, National Institute of Science Education & Research, An OCC of Homi Bhabha National Institute, Bhubaneswar, Khurda, Odisha-752050, INDIA.

---

### *Determination of turnover frequency (TOF) of catalyst 1 for OER from the redox features of CV:*

Calculated area acquired from  $C_{dl}$  curve considering low scan rate of 30 mV/sec = 0.00913 mVAcm<sup>-2</sup>

$$\begin{aligned}\text{Hence, the associated charge} &= 0.00913 \text{ mVAcm}^{-2} / 30 \text{ mVs}^{-1} \\ &= 0.0003043 \text{ Asc m}^{-2} \\ &= \mathbf{0.0003043 \text{ Ccm}^{-2}}\end{aligned}$$

$$\begin{aligned}\text{Now, the number of electrons transferred} &= 0.0003043 \text{ Ccm}^{-2} / 1.602 \times 10^{-19} \text{ C} \\ &= \mathbf{0.190 \times 10^{15} \text{ cm}^{-2}}\end{aligned}$$

The corresponding expression to determine Turnover Frequency (TOF) from OER current density is,

$$TOF = \frac{j \times N_A}{n \times F \times \tau} \dots \dots \dots (S1)$$

where,  $j$  = current density,  $N_A$  = Avogadro number,  $F$  = Faraday constant,  $n$  = number of electrons for OER = 4,  $\Gamma$  = surface concentration.

Hence, we have,

$$\begin{aligned}TOF_{1.74 \text{ V}} &= [(0.126) \text{ Acm}^{-2}(6.023 \times 10^{23}) \text{ mol}^{-1}] / [(96485) \text{ Cmol}^{-1} (4) (0.190 \times 10^{15}) \text{ cm}^{-2}] \\ &= \mathbf{1034 \text{ sec}^{-1}}\end{aligned}$$

***Determination of turnover frequency (TOF) of catalyst 1 for HER from the redox features of CV:***

Calculated area acquired from  $C_{dl}$  curve considering low scan rate of 30 mV/sec = 0.000836 mVAcm<sup>-2</sup>

Hence, the associated charge = 0.000836 mVAcm<sup>-2</sup> / 30 mVs<sup>-1</sup>

$$= 0.00002786 \text{ Asc m}^{-2}$$

$$= \mathbf{0.00002786 \text{ Ccm}^{-2}}$$

Now, the number of electrons transferred = 00002786 Ccm<sup>-2</sup> / 1.602 × 10<sup>-19</sup> C

$$= \mathbf{0.174 \times 10^{15} \text{ cm}^{-2}}$$

The corresponding expression to determine Turnover Frequency (TOF) from HER current density is,

$$TOF = \frac{j \times N_A}{n \times F \times \tau} \dots \dots \dots (S1)$$

where,  $j$  = current density,  $N_A$  = Avogadro number,  $F$  = Faraday constant,  $n$  = number of electrons for HER =2,  $\Gamma$  = surface concentration.

Hence, we have,

$$\begin{aligned} TOF_{-0.423 \text{ V}} &= [(0.078) \text{ Acm}^{-2}(6.023 \times 10^{23}) \text{ mol}^{-1}] / [(96485) \text{ Cmol}^{-1} (2) (0.174 \times 10^{15}) \text{ cm}^{-2}] \\ &= \mathbf{1390 \text{ sec}^{-1}} \end{aligned}$$

## Figures with captions

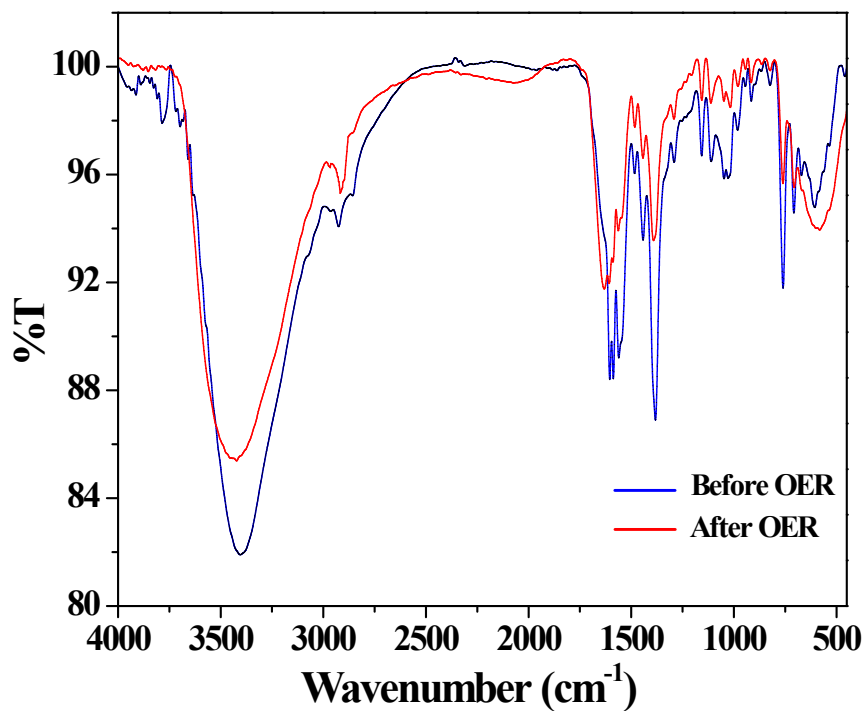

Fig. S1. FTIR spectra of **1** in the region of 4000-450  $\text{cm}^{-1}$  before (—) and after (—) OER.

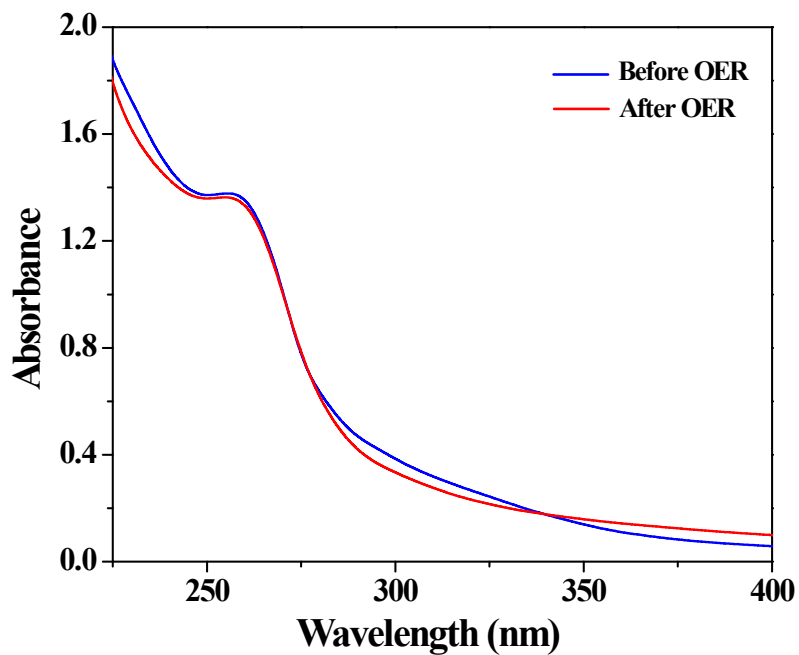

**Fig. S2.** UV-Vis spectra of **1** at  $10^{-4}$  (M) in aqueous solution before (—) and after (—) OER.

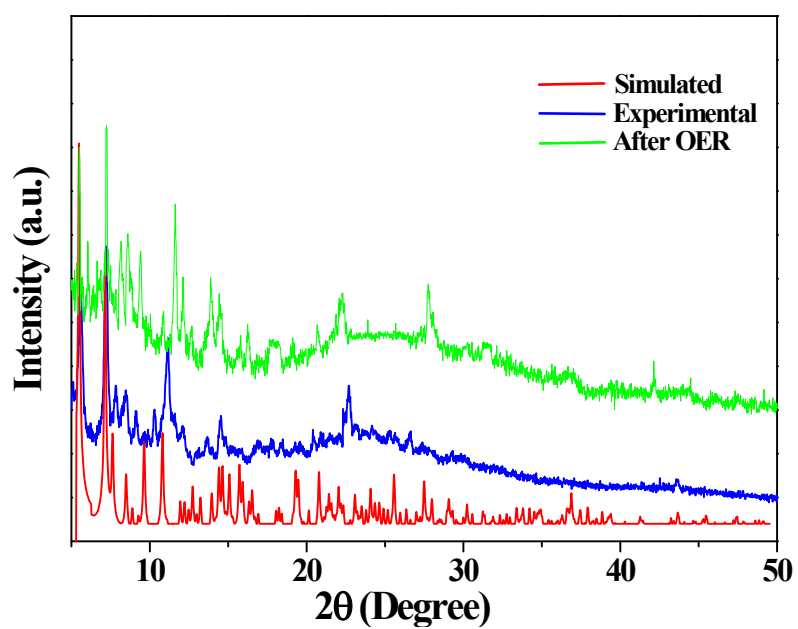

**Fig. S3.** Powder X-ray diffraction (PXRD) patterns of **1**: simulated PXRD (—), and experimental PXRD before (—) and after (—) OER.

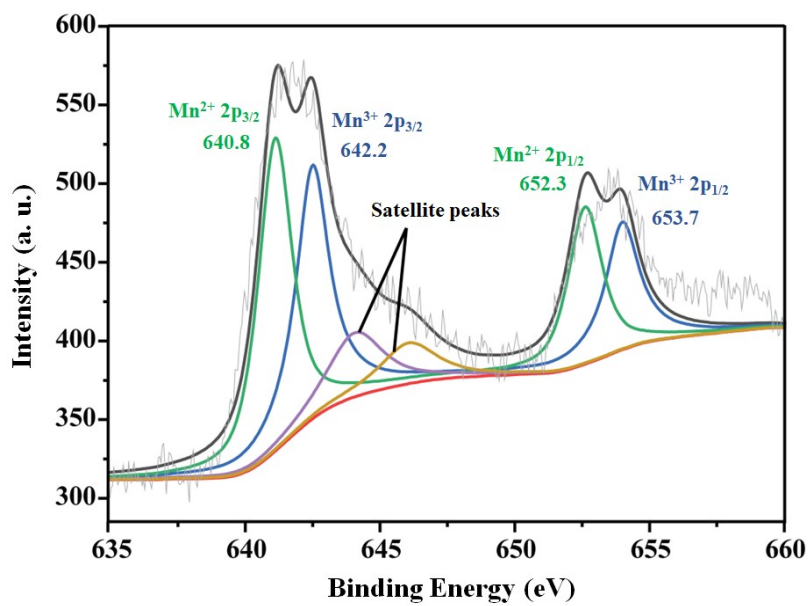

(a)

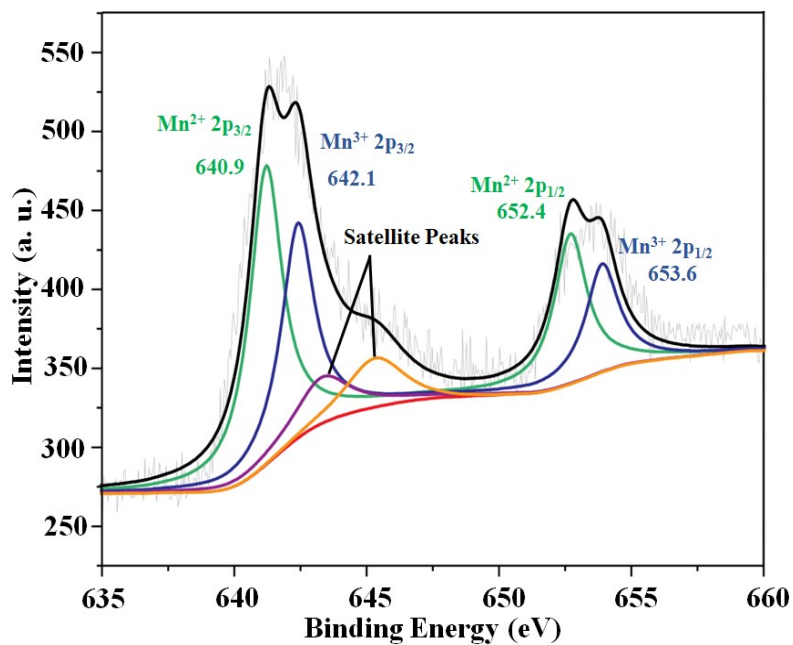

(b)

**Fig. S4.** X-ray photoelectron spectra (XPS) of the manganese 2p level in **1** (a) before and (b) after OER.

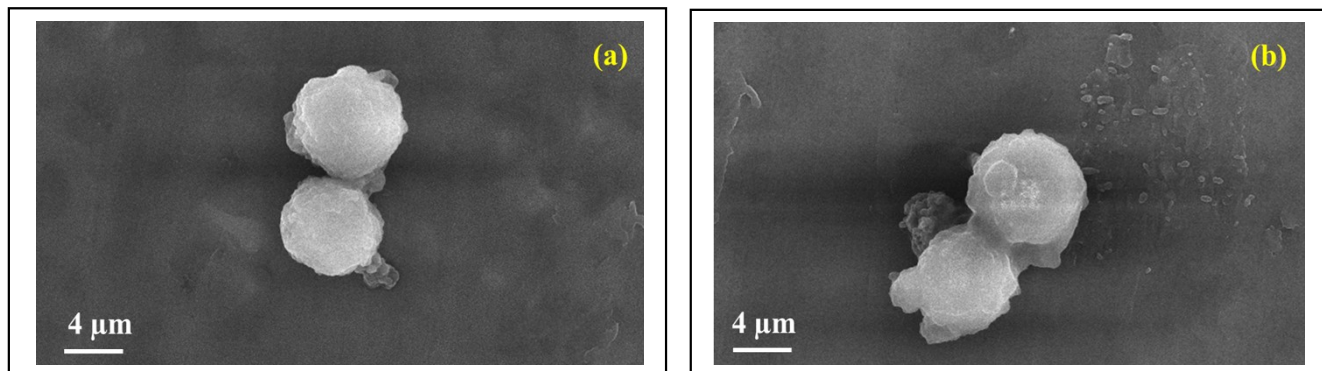

**Fig. S5.** Field emission scanning electron microscopic (FESEM) images of **1** (a) before and (b) after OER.

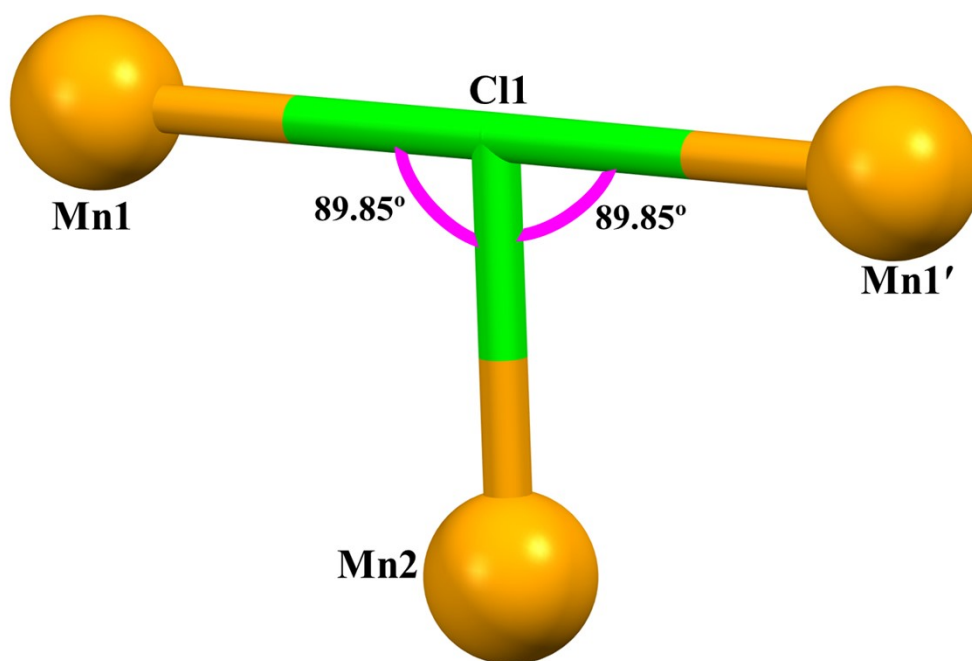

**Fig. S6.** Arrangement of Mn1, Mn2 and Mn1' atoms with C11 atom in **1** making a T-shaped geometry.

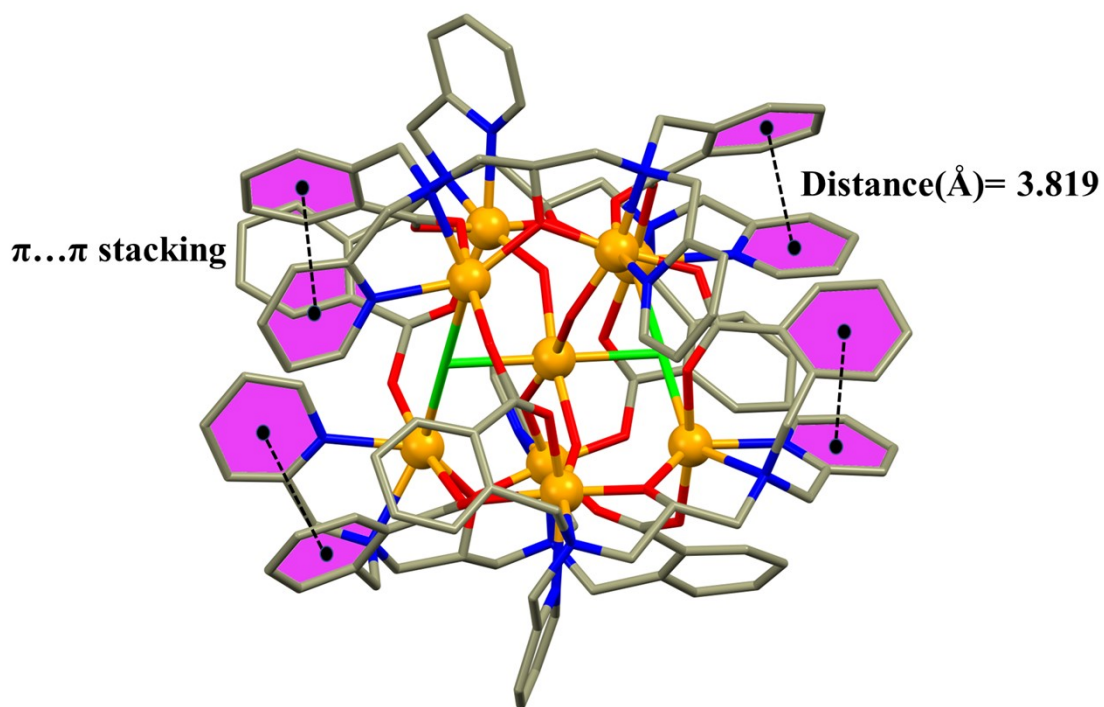

Fig. S7. A view of **1** showing intra-molecular  $\pi \dots \pi$  stacking interactions.

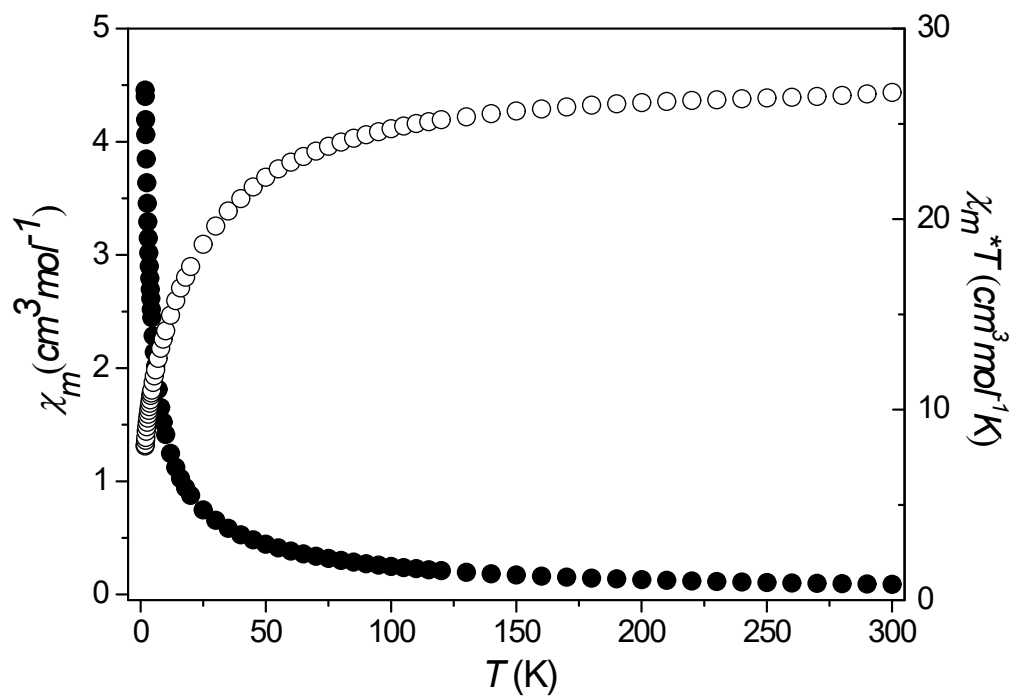

**Fig. S8.** Temperature dependence of  $\chi_m$  (●) and  $\chi_m T$  (○) ( $\chi_m$  per  $\text{Mn}^{\text{II}}_5\text{Mn}^{\text{III}}_4$  unit) for **1**.

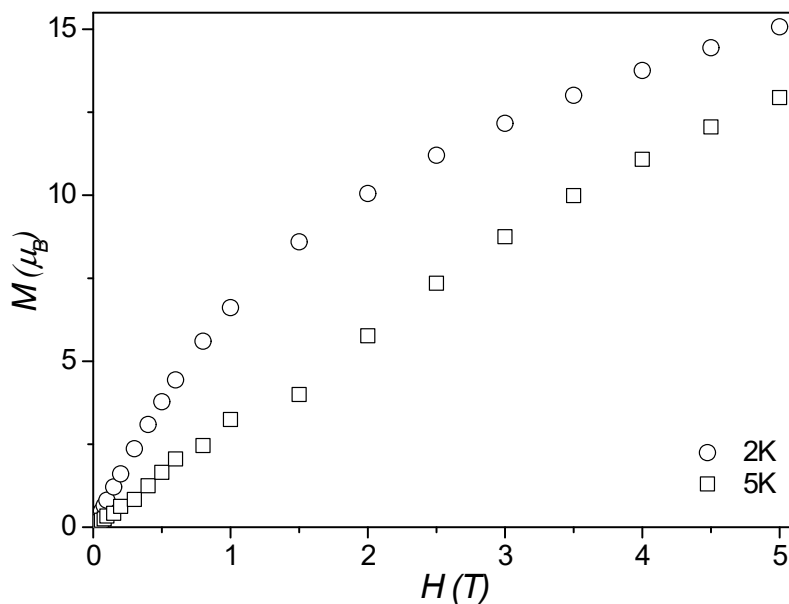

**Fig. S9.** Field (H) dependence of the magnetization (M) (magnetization per  $\text{Mn}^{\text{II}}_5\text{Mn}^{\text{III}}_4$  unit) for **1** at 2 and 5 K.

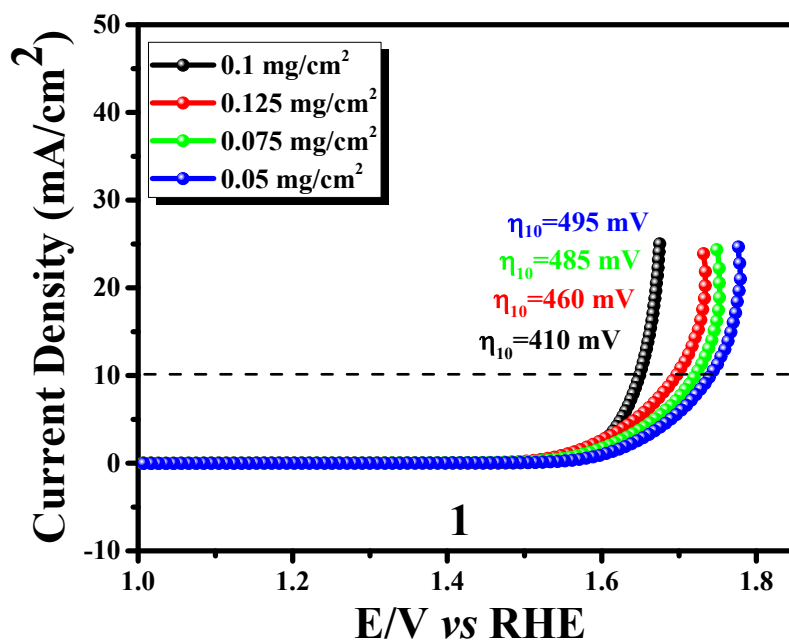



Fig. S10. Mass loading dependency of **1** for OER studies.

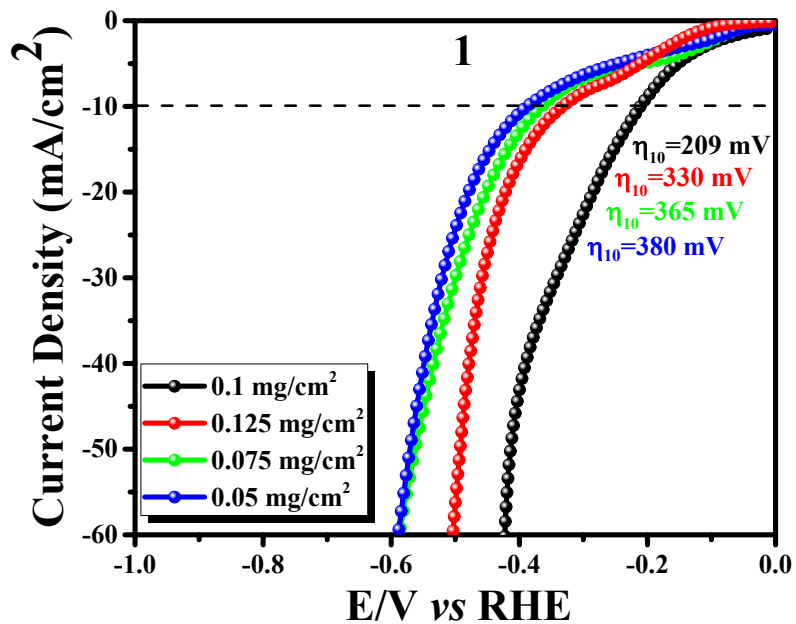

Fig. S11. Mass loading dependency of **1** for HER studies.

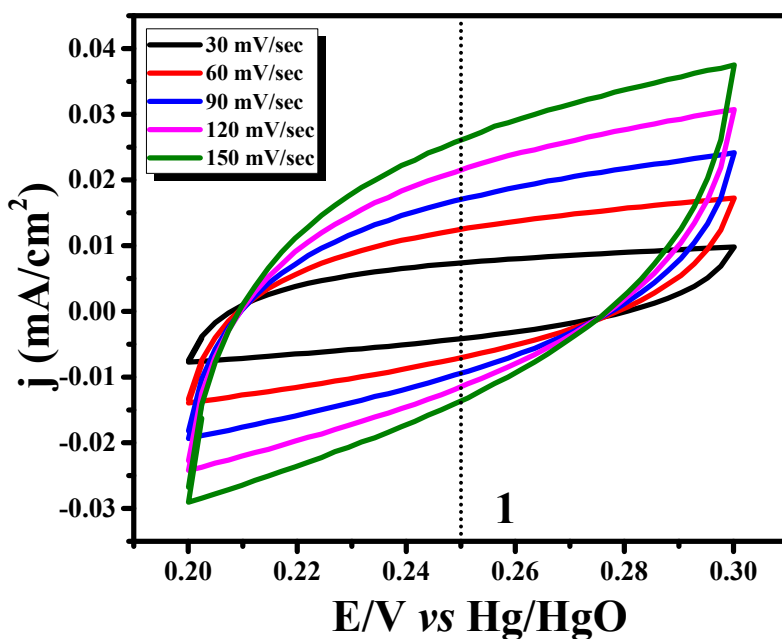

Fig. S12. CV outcomes of **1** under non-Faradaic region with various scan rates in OER studies.

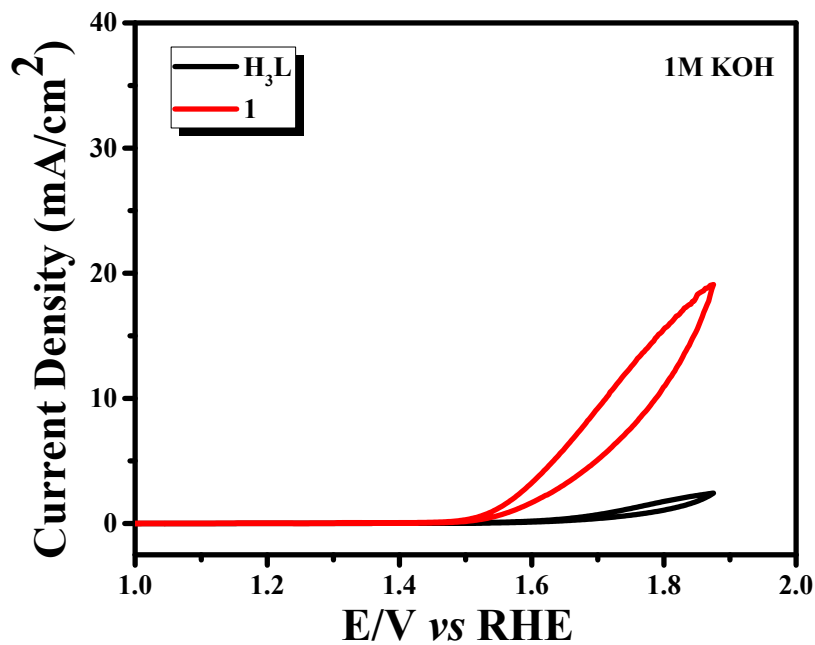

Fig. S13. CV outcomes of H<sub>3</sub>L and cluster 1 in 1M KOH alkaline medium for OER studies.

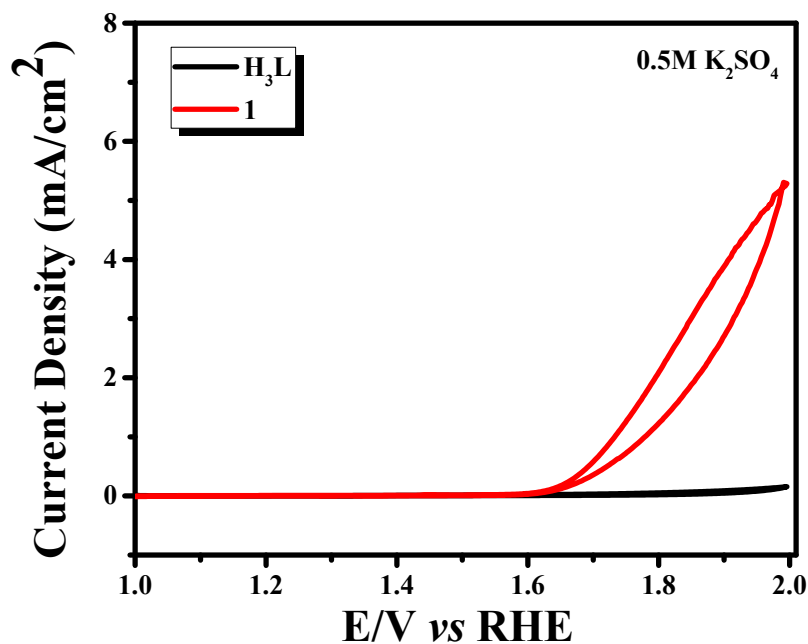

Fig. S14. CV outcomes of H<sub>3</sub>L and cluster 1 in 0.5M K<sub>2</sub>SO<sub>4</sub> neutral medium for OER studies.

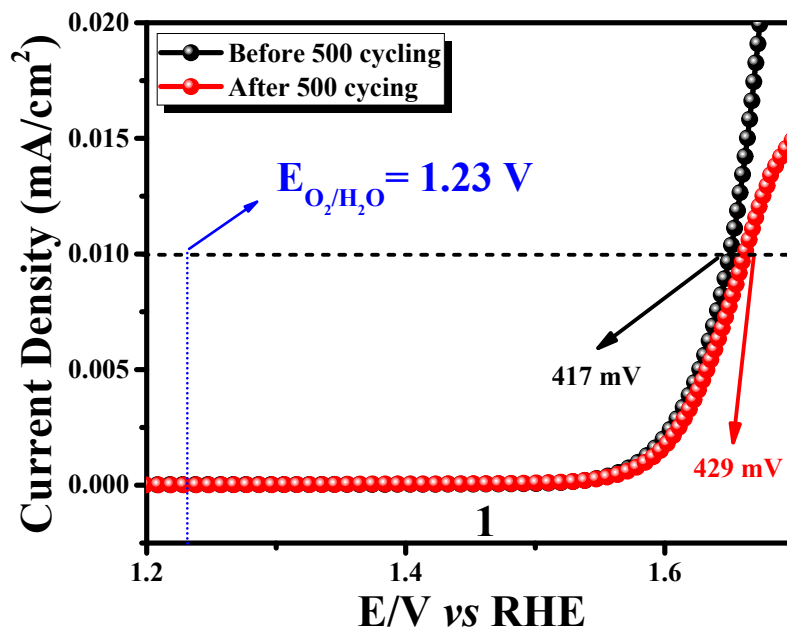

Fig. S15. LSV outcomes of 1 before and after OER AD studies.

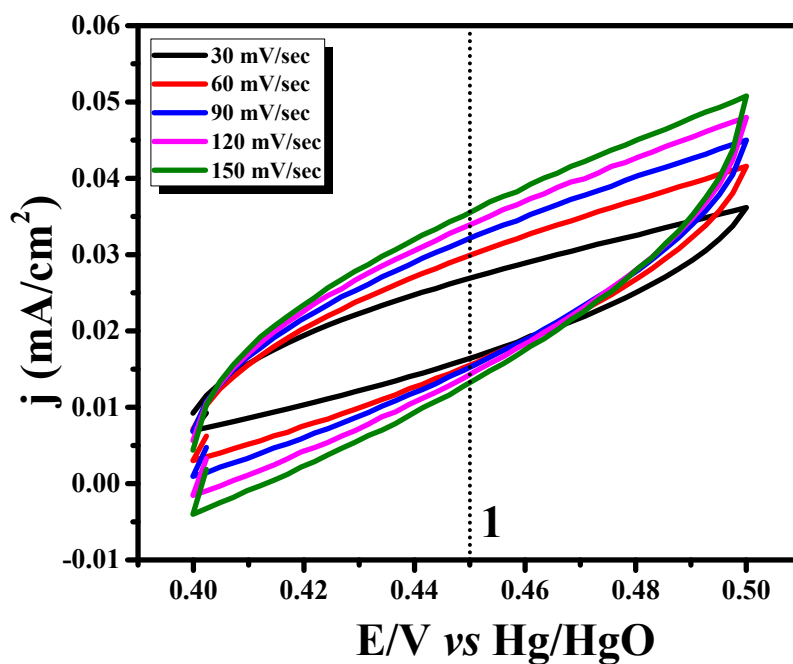

Fig. S16. CV outcomes of 1 under non-Faradaic region with various scan rates in HER studies.

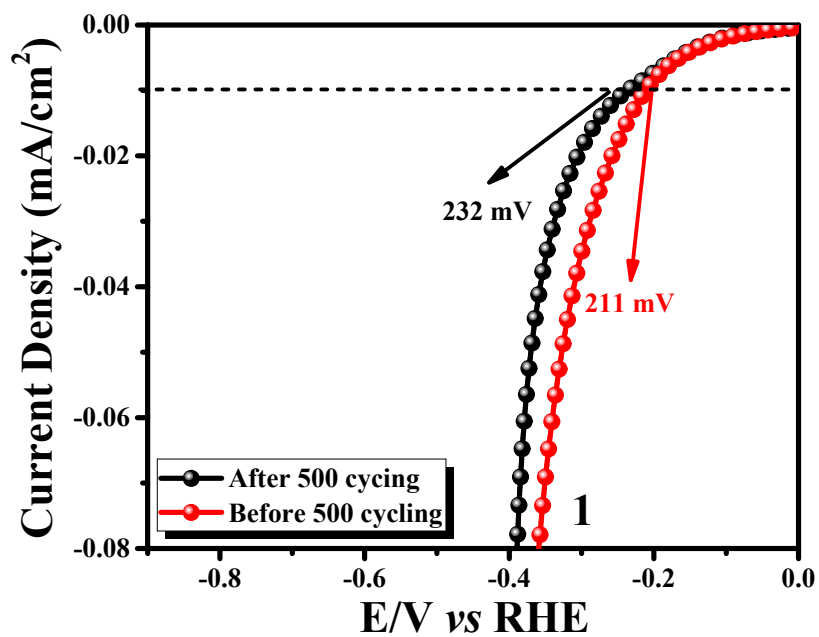

Fig. S17. LSV outcomes of 1 before and after HER AD studies.

## Tables with captions

| <b>Table S1.</b> Crystal data and refinement parameters for [Mn <sub>9</sub> L <sub>4</sub> (μ <sub>2</sub> -O) <sub>4</sub> (μ <sub>3</sub> -Cl) <sub>2</sub> ] (1) |                                                                                                   |
|----------------------------------------------------------------------------------------------------------------------------------------------------------------------|---------------------------------------------------------------------------------------------------|
| Empirical formula                                                                                                                                                    | C <sub>124</sub> H <sub>116</sub> N <sub>16</sub> O <sub>24</sub> Cl <sub>2</sub> Mn <sub>9</sub> |
| Formula weight                                                                                                                                                       | 2779.689                                                                                          |
| Crystal system                                                                                                                                                       | cubic                                                                                             |
| Space group                                                                                                                                                          | <i>Ia-3d</i>                                                                                      |
| <i>a</i> , Å                                                                                                                                                         | 48.362(2)                                                                                         |
| <i>b</i> , Å                                                                                                                                                         | 48.362(2)                                                                                         |
| <i>c</i> , Å                                                                                                                                                         | 48.362(2)                                                                                         |
| <i>α</i> , deg                                                                                                                                                       | 90                                                                                                |
| <i>β</i> , deg                                                                                                                                                       | 90                                                                                                |
| <i>γ</i> , deg                                                                                                                                                       | 90                                                                                                |
| Volume, Å <sup>3</sup>                                                                                                                                               | 113112(9)                                                                                         |
| <i>Z</i>                                                                                                                                                             | 24                                                                                                |
| Density (calculated), Mg/m <sup>3</sup>                                                                                                                              | 0.979                                                                                             |
| Wavelength, Å                                                                                                                                                        | 1.54178                                                                                           |
| Temperature, K                                                                                                                                                       | 154.00                                                                                            |
| <i>F</i> (000)                                                                                                                                                       | 34152                                                                                             |
| Absorption coefficient, mm <sup>-1</sup>                                                                                                                             | 5.414                                                                                             |
| <i>θ</i> range for data collection, deg                                                                                                                              | 2.238 to 31.362                                                                                   |
| Reflections collected                                                                                                                                                | 1534                                                                                              |
| Independent reflections                                                                                                                                              | 1362                                                                                              |
| <i>R</i> ( <i>F</i> obsd data) [ <i>I</i> > 2σ( <i>I</i> )]                                                                                                          | 0.0945                                                                                            |
| <i>wR</i> ( <i>F</i> <sup>2</sup> all data)                                                                                                                          | 0.2610                                                                                            |
| Goodness-of-fit on <i>F</i> <sup>2</sup>                                                                                                                             | 1.102                                                                                             |
| Largest diff. peak and hole, e/Å <sup>3</sup>                                                                                                                        | +0.376 to -0.443                                                                                  |

$$wR2 = \{\sum [w(F_o^2 - F_c^2)^2] / \sum [w(F_o^2)^2]\}^{1/2} R1 = \sum ||F_o| - |F_c|| / \sum |F_o|$$

**Table S2.** Selected bond distances (Å) and angles (deg) for [Mn<sub>9</sub>(L)<sub>4</sub>(μ<sub>2</sub>-O)<sub>4</sub>(μ<sub>3</sub>-Cl)<sub>2</sub>] (**1**)

| <b>Bond distances (Å)</b> |           |                    |           |
|---------------------------|-----------|--------------------|-----------|
| Mn(1)-O(1)                | 2.103(16) | Mn(2)-Cl(1)        | 2.537(10) |
| Mn(1)-O(2)                | 2.178(18) | Mn(3)-O(1)         | 1.890(17) |
| Mn(1)-O(5)                | 2.19(2)   | Mn(3)-O(3)         | 1.89(2)   |
| Mn(1)-N(1)                | 2.44(2)   | Mn(3)-O(4)         | 2.176(17) |
| Mn(1)-N(2)                | 2.33(2)   | Mn(3)-O(6)         | 1.921(15) |
| Mn(1)-Cl(1)               | 2.777(4)  | Mn(3)-N(3)         | 2.13(2)   |
| Mn(2)-O(6)                | 2.192(13) | Mn(3)-N(4)         | 2.29(2)   |
| <b>Bond angles (deg)</b>  |           |                    |           |
| O(1)-Mn(1)-O(2)           | 84.2(6)   | O(6)-Mn(2)-O(6')   | 90.29(5)  |
| O(1)-Mn(1)-O(5)           | 92.5(6)   | Cl(1)-Mn(2)-Cl(1') | 180.0     |
| O(1)-Mn(1)-N(1)           | 71.5(7)   | O(1)-Mn(3)-O(3)    | 173.1(8)  |
| O(1)-Mn(1)-N(2)           | 138.3(8)  | O(1)-Mn(3)-O(4)    | 94.9(6)   |
| O(1)-Mn(1)-Cl(1)          | 135.3(5)  | O(1)-Mn(3)-O(6)    | 82.4(7)   |
| O(2)-Mn(1)-O(5)           | 173.3(7)  | O(1)-Mn(3)-N(3)    | 82.0(8)   |
| O(2)-Mn(1)-N(1)           | 79.2(7)   | O(1)-Mn(3)-N(4)    | 96.3(7)   |
| O(2)-Mn(1)-N(2)           | 105.5(7)  | O(3)-Mn(3)-O(4)    | 84.9(7)   |
| O(2)-Mn(1)-Cl(1)          | 79.1(5)   | O(3)-Mn(3)-O(6)    | 104.5(7)  |
| O(5)-Mn(1)-N(1)           | 105.3(8)  | O(3)-Mn(3)-N(3)    | 91.1(8)   |
| O(5)-Mn(1)-N(2)           | 80.9(7)   | O(3)-Mn(3)-N(4)    | 81.9(7)   |
| O(5)-Mn(1)-Cl(1)          | 99.5(6)   | O(4)-Mn(3)-O(6)    | 93.8(6)   |
| N(1)-Mn(1)-N(2)           | 70.8(9)   | O(4)-Mn(3)-N(3)    | 87.6(8)   |
| N(1)-Mn(1)-Cl(1)          | 142.6(6)  | O(4)-Mn(3)-N(4)    | 159.0(7)  |
| N(2)-Mn(1)-Cl(1)          | 86.3(7)   | O(6)-Mn(3)-N(3)    | 164.3(8)  |
| O(6)-Mn(2)-Cl(1)          | 94.1(4)   | O(6)-Mn(3)-N(4)    | 105.3(7)  |
| O(6')-Mn(2)-Cl(1)         | 85.9(4)   | N(3)-Mn(3)-N(4)    | 76.4(8)   |

**Table S3.** Overpotential ( $\eta$ ) and current density ( $j$ ) values of some reported metal oxide- or metal chelate-based electrocatalysts towards oxygen evolution reaction (OER)

| Sl. No.   | Metal Oxide/Metal Chelate-Based Electrocatalysts                                                                              | Overpotential ( $\eta$ ) (mV) | Current Density ( $j$ ) (mA/cm <sup>2</sup> ) | Ref.             |
|-----------|-------------------------------------------------------------------------------------------------------------------------------|-------------------------------|-----------------------------------------------|------------------|
| 1.        | MnO <sub>2</sub> -Ni <sub>0.002(M)</sub>                                                                                      | 445                           | 10                                            | 53               |
| 2.        | Carbon Dots 0.15-MnO <sub>2</sub>                                                                                             | 343                           | 10                                            | 54               |
| 3.        | urchin-like $\alpha$ -MnO <sub>2</sub>                                                                                        | 640                           | -                                             | 55               |
| 4.        | Co-intercalated layered MnO <sub>2</sub>                                                                                      | 360                           | 10                                            | 56               |
| 5.        | $\alpha$ -MnO <sub>2</sub> -SF                                                                                                | 490                           | 10                                            | 57               |
| 6.        | (NMe <sub>4</sub> )[Cu <sup>III</sup> (L <sub>1</sub> )]                                                                      | 560                           | -                                             | 58               |
| 7.        | [Fe <sup>III</sup> (dpaq)(H <sub>2</sub> O)](ClO <sub>4</sub> ) <sub>2</sub>                                                  | 200-250                       | -                                             | 59               |
| <b>8.</b> | <b>[Mn<sub>9</sub>L<sub>4</sub>(<math>\mu</math><sub>2</sub>-O)<sub>4</sub>(<math>\mu</math><sub>3</sub>-Cl)<sub>2</sub>]</b> | <b>410</b>                    | <b>10</b>                                     | <b>This Work</b> |

**Table S4** Overpotential ( $\eta$ ) and current density ( $j$ ) values of some reported metal oxide- or metal chelate-based electrocatalysts towards hydrogen evolution reaction (HER)

| Sl. No. | Metal Oxide/Metal Chelate-Based Electrocatalysts                                                                                                                                                                                      | Overpotential ( $\eta$ ) (mV) | Current Density ( $j$ ) (mA/cm <sup>2</sup> ) | Ref.             |
|---------|---------------------------------------------------------------------------------------------------------------------------------------------------------------------------------------------------------------------------------------|-------------------------------|-----------------------------------------------|------------------|
| 1.      | Ni@NiL1-Sal                                                                                                                                                                                                                           | 384                           | 10                                            | 66               |
| 2.      | [Mo <sub>3</sub> S <sub>13</sub> ] <sup>2-</sup> Cluster                                                                                                                                                                              | 220                           | 10                                            | 67               |
| 3.      | [Ag <sub>4</sub> (S <sub>2</sub> PFc(OMe) <sub>4</sub> ) <sub>4</sub> ]                                                                                                                                                               | 932                           | 5                                             | 68               |
| 4.      | [MnBr(pybz)(CO) <sub>3</sub> ]                                                                                                                                                                                                        | 280                           | 10                                            | 69               |
| 5.      | [{Cu <sup>II</sup> (2,2'-bpy)(H <sub>2</sub> O) <sub>2</sub> }] [ {Co <sup>II</sup> W <sup>VI</sup> <sub>12</sub> O <sub>40</sub> } {Cu <sup>II</sup> (2,2'-bpy)(H <sub>2</sub> O)} {Cu <sup>II</sup> (2,2'-bpy)} ]·2H <sub>2</sub> O | 520                           | 1                                             | 70               |
| 6.      | [(UO <sub>2</sub> ) <sub>2</sub> ( $\mu$ -L) <sub>2</sub> ]                                                                                                                                                                           | 274                           | -                                             | 71               |
| 7.      | K <sub>10</sub> [{K <sub>4</sub> (H <sub>2</sub> O) <sub>6</sub> } {UO <sub>2</sub> } <sub>2</sub> ( $\alpha$ -PW <sub>9</sub> O <sub>34</sub> ) <sub>2</sub> ]·13H <sub>2</sub> O                                                    | 115                           | 1                                             | 72               |
| 8.      | MnO <sub>x</sub> /Ti                                                                                                                                                                                                                  | 240                           | 100                                           | 73               |
| 9.      | [Mn <sub>9</sub> L <sub>4</sub> ( $\mu$ <sub>2</sub> -O) <sub>4</sub> ( $\mu$ <sub>3</sub> -Cl) <sub>2</sub> ]                                                                                                                        | 209                           | 10                                            | <b>This Work</b> |
